# Supplementary material for: Curcumin Potentiates α7 Nicotinic Acetylcholine Receptors and Alleviates Autistic-Like Social Deficits and Brain Oxidative Stress Status in Mice
Source: MDPI journal article supplement (doi:10.3390/ijms22147251), 2021-07-06
Supplement: s1 [file s1]

## Supplementary Materials:

The following are available online at [www.mdpi.com/xxx/s1](http://www.mdpi.com/xxx/s1).

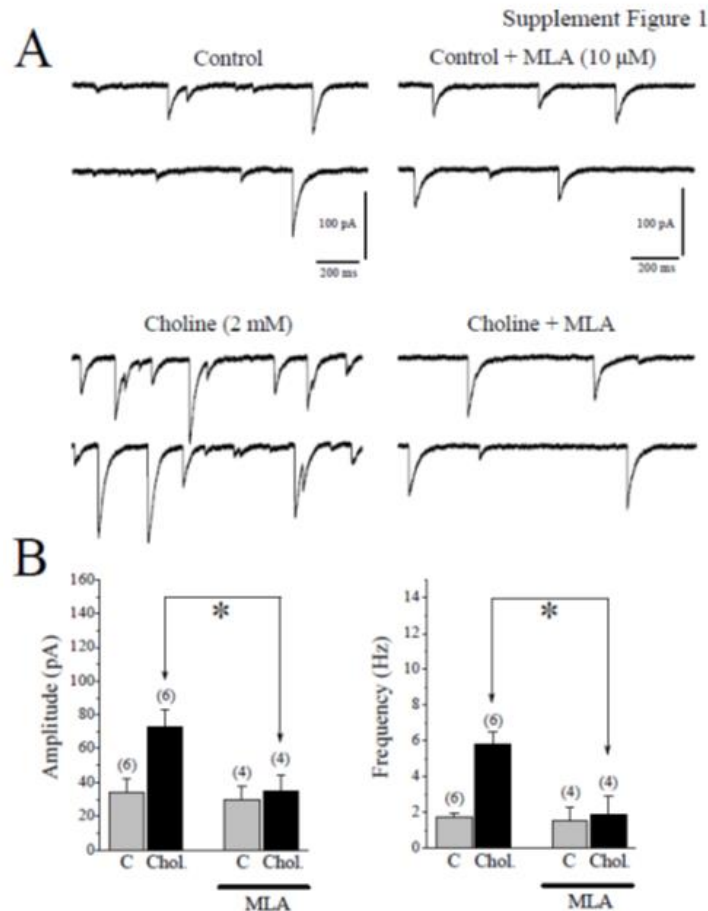

**Figure S1.** The effect of methyllycaconitine on choline-induced enhancement of GABAA receptor-mediated spontaneous synaptic events in CA1 pyramidal neurons. Whole-cell recordings were performed using CsCl-based electrode solution at a holding potential of  $-70$  mV. (A) On the left, application of choline (2 mM) for 30 sec increased the amplitudes and frequencies of spontaneous inhibitory postsynaptic currents (sIPSCs;  $n = 6$ ). On the right, in another cell, choline-induced enhancements of sIPSCs were reduced significantly after co-application of choline and methyllycaconitine (10  $\mu$ M). (B) Summary of the effects of methyllycaconitine (10  $\mu$ M) on choline-induced responses. The averaged amplitudes (on the left) and the frequencies (on the right) of sIPSCs were presented before (control C, gray bars) and after (black bars) choline (Chol. 2 mM) application. For comparison, the effect of choline on the GABAA receptor-mediated sIPSCs is shown in the absence (same set of neurons used in left panel of the Figure 2) and the presence of methyllycaconitine. Bars represent the means  $\pm$  S.E. of four to six experiments (\*  $p < 0.05$  vs. control; ANOVA). C, control; Chol., choline; and MLA, methyllycaconitine.
